# Supplementary material for: Evaluation of Humoral Immunity toMycobacterium tuberculosis-Specific Antigens for Correlation with Clinical Status and Effective Vaccine Development
Source: Hindawi journal article supplement (doi:10.1155/2015/527395), 2015-01-01
Supplement: f1 [file 527395.f1.zip]

Supplemental Table 1. Classification of Clinical Status

|                                                  | (←minimal)      |          |                         | (severe→)      |
|--------------------------------------------------|-----------------|----------|-------------------------|----------------|
| Smear at entry <sup>a</sup>                      | 0 to ±          | 1+       | 2+                      | 3+             |
| Positive conversion time (weeks) <sup>b</sup>    | ≥ 3             | 2        | 1                       | 0              |
| Duration of culture negative (days) <sup>c</sup> | < 20            | 20 ≤ <40 | 40 ≤ < 60               | ≥ 60           |
| CRP at entry (mg/ml)                             |                 | < 2      |                         | ≥ 2            |
| Albumin at entry (g/ml)                          | ≥ 4             |          | 3 ≤ < 4                 | < 3            |
| CRP after 60 days (mg/ml)                        | 0               |          | < 2                     | ≥ 2            |
| X-ray type (cavity) <sup>d</sup>                 | III (no cavity) |          | II (morbid foci than I) | I (widespread) |
| X-ray extent <sup>d</sup>                        | 1               |          | 2                       | 3              |

a: 0 (no acid fast bacilli (AFB) on smear), ± (1-2 AFB per 300 field), 1+ (1-9 AFB per 100 field), 2+ (more than 10 AFB per 100 field), and 3+ (more than 10 AFB per field).

b:Positive results (weeks) of MGIT from entry.

c: Durations (days) to be negative results of smear by sputum microscopy after initiation of the treatment.

d: "The Japanese Society for Tuberculosis Classification" was applied [20].

Supplemental Table 2. Amount of antigens used for the detection of serum IgG and IgA.

| TB Antigens     | IgG ELISA                     | IgA ELISA                     |
|-----------------|-------------------------------|-------------------------------|
|                 | ( $\mu\text{g}/\text{well}$ ) | ( $\mu\text{g}/\text{well}$ ) |
| ESAT-6 (Rv3875) | 0.5                           | 2.5                           |
| CFP-10 (Rv3874) | 0.5                           | 2.5                           |
| MDP1 (Rv2986c)  | 0.05                          | 0.5                           |
| Ag85A (Rv3804c) | 0.05                          | 0.5                           |
| Acr (Rv2031c)   | 0.5                           | 2.5                           |
| HBHA (Rv0475)   | 0.5                           | 2.5                           |
| HrpA (Rv0251c)  | 0.5                           | 2.5                           |

Supplemental Table 3. Association between titers of IgA and clinical status.

|                                  | ESAT-6  | CFP-10   | MDP1     | Ag85A    | Acr     | HBHA     | HrpA     |
|----------------------------------|---------|----------|----------|----------|---------|----------|----------|
| Smear at entry                   |         |          |          |          |         |          |          |
| r                                | 0.154   | -0.05877 | -0.09966 | 0.026789 | 0.08973 | 0.05675  | -0.03961 |
| p                                | 0.19976 | 0.62637  | 0.40827  | 0.8245   | 0.45676 | 0.63828  | 0.74292  |
| Positive Conversion time (weeks) |         |          |          |          |         |          |          |
| r                                | 0.1018  | 0.01556  | -0.02547 | 0.07465  | 0.04275 | -0.00991 | -0.07863 |
| p                                | 0.40173 | 0.89829  | 0.83423  | 0.53912  | 0.72532 | 0.93511  | 0.51762  |
| Duration culture negative (days) |         |          |          |          |         |          |          |
| r                                | 0.0654  | 0.02624  | 0.06089  | 0.00791  | 0.05718 | 0.08827  | -0.10502 |
| p                                | 0.61353 | 0.83957  | 0.63824  | 0.95133  | 0.65893 | 0.4951   | 0.41661  |

CRP at entry (mg/ml)

|   |         |         |         |         |         |          |                 |
|---|---------|---------|---------|---------|---------|----------|-----------------|
| r | 0.10193 | 0.01868 | 0.02661 | 0.04139 | 0.1175  | -0.11609 | <b>-0.25058</b> |
| p | 0.39765 | 0.87709 | 0.82563 | 0.73183 | 0.32911 | 0.33502  | <b>0.03506*</b> |

Albumin at entry (g/ml)

|   |                 |         |          |         |                 |          |         |
|---|-----------------|---------|----------|---------|-----------------|----------|---------|
| r | <b>0.33422</b>  | 0.05802 | -0.03364 | 0.05185 | <b>0.34487</b>  | -0.04649 | -0.0641 |
| p | <b>0.00439*</b> | 0.63078 | 0.78063  | 0.66761 | <b>0.00323*</b> | 0.70025  | 0.59534 |

CRP after 60 days (mg/ml)

|   |         |         |         |         |         |         |         |
|---|---------|---------|---------|---------|---------|---------|---------|
| r | 0.13127 | 0.11439 | 0.15752 | 0.10689 | 0.10689 | 0.19502 | 0.17252 |
| p | 0.30514 | 0.37202 | 0.21759 | 0.40439 | 0.40439 | 0.12559 | 0.17635 |

X-ray type (cavity)

|   |         |          |         |         |          |         |          |
|---|---------|----------|---------|---------|----------|---------|----------|
| r | 0.00668 | -0.03311 | 0.0079  | 0.01562 | -0.01287 | 0.05442 | -0.02875 |
| p | 0.9559  | 0.78397  | 0.94787 | 0.89711 | 0.91515  | 0.6522  | 0.81301  |

X-ray (extent)

|   |         |         |         |         |          |         |          |
|---|---------|---------|---------|---------|----------|---------|----------|
| r | 0.21033 | 0.01258 | 0.02114 | 0.13727 | 0.175153 | 0.05624 | -0.08867 |
| p | 0.07831 | 0.91708 | 0.86112 | 0.25365 | 0.14402  | 0.64133 | 0.46212  |

---

Statistical significance ( $p < 0.05$  or  $p < 0.01$ ) appeared with an asterisk.

Supplemental Table 4. Association between TB gene and BCG ortholog (identity)

| TB Gene         | BCG ortholog (identity) |
|-----------------|-------------------------|
| ESAT-6 (Rv3875) | Not identified          |
| CFP-10 (Rv3874) | Not identified          |
| MDP1 (Rv2986c)  | BCG_3007 (0.958)        |
| Ag85A (Rv3804c) | BCG_3866c (1.00)        |
| Acr (Rv2031c)   | BCG_2080 (1.00)         |
| HBHA (Rv0475)   | BCG_0516 (1.00)         |
| HrpA (Rv0251c)  | BCG_0257c (1.00)        |
