# Supplementary figures and images for: Evaluation of Humoral Immunity toMycobacterium tuberculosis-Specific Antigens for Correlation with Clinical Status and Effective Vaccine Development
Source: Hindawi journal article supplement (doi:10.1155/2015/527395), 2015-01-01

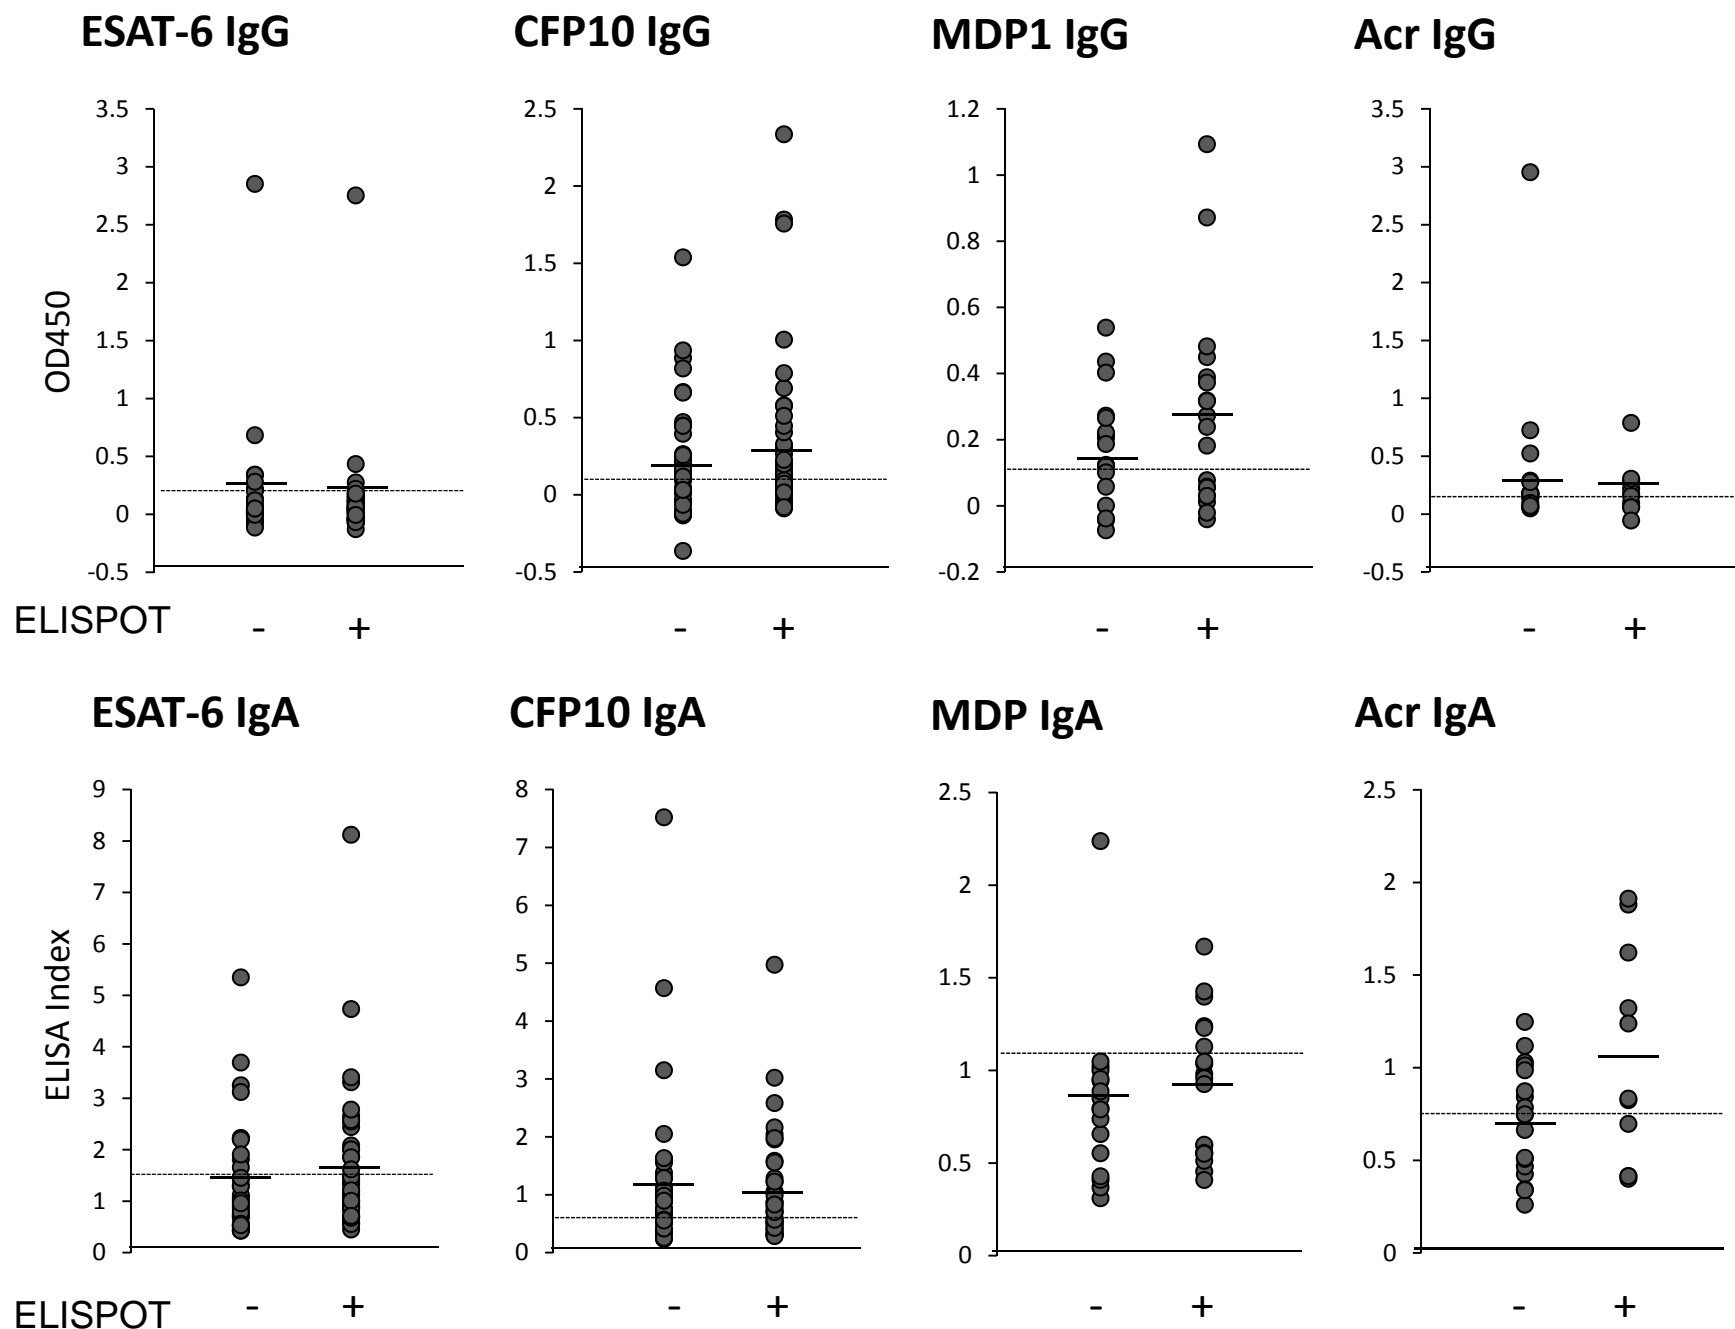

Supplemental Figure 1

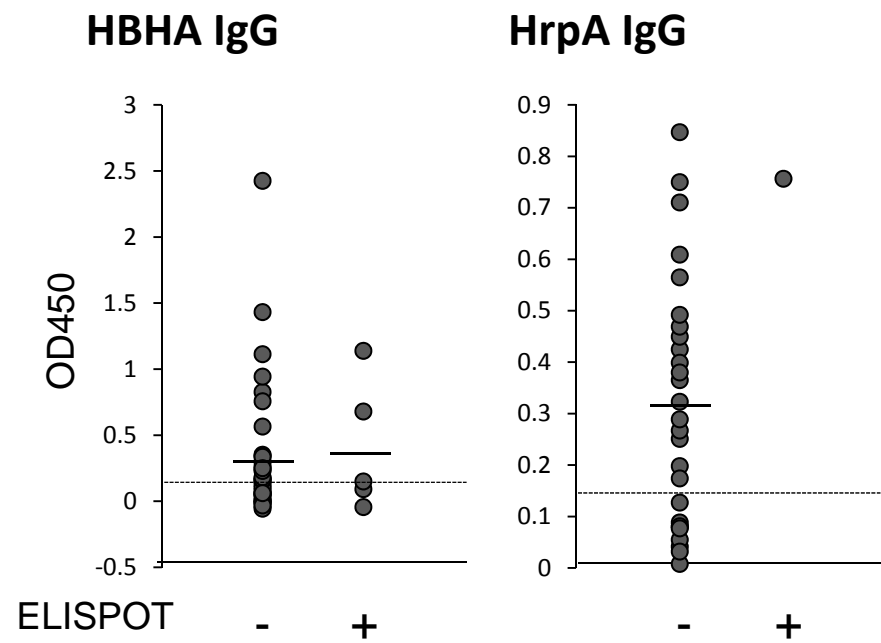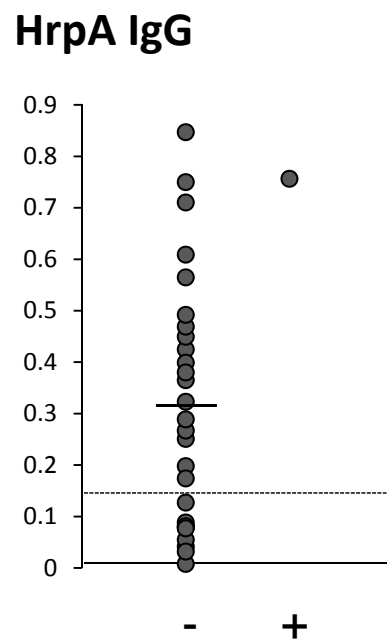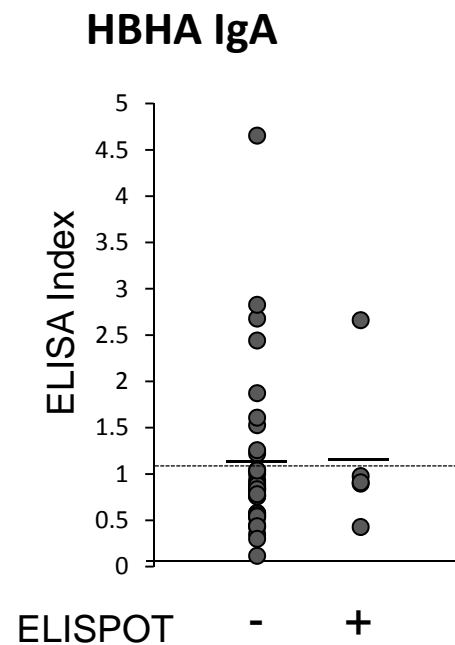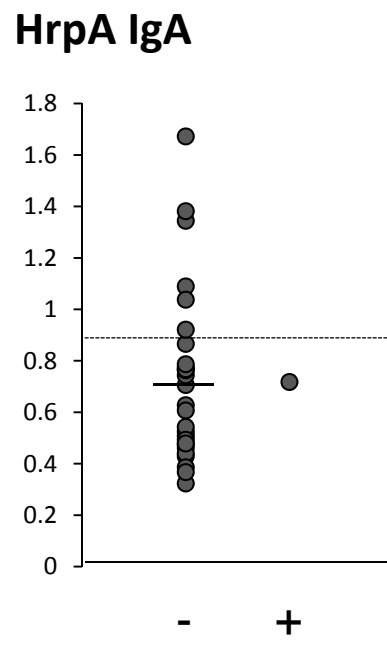

Supplemental Figure 1 (cont'd)

Supplement: f1 [file 527395.f1.zip]
